# Supplementary material for: The Cohesion Protein SOLO Associates with SMC1 and Is Required for Synapsis, Recombination, Homolog Bias and Cohesion and Pairing of Centromeres in Drosophila Meiosis
Source: PubMed Central journal article supplement (PMC3715423; doi:10.1371/journal.pgen.1003637), 2013-07-18
Supplement: pgen.1003637.s006.pdf [file pgen.1003637.s006.pdf]

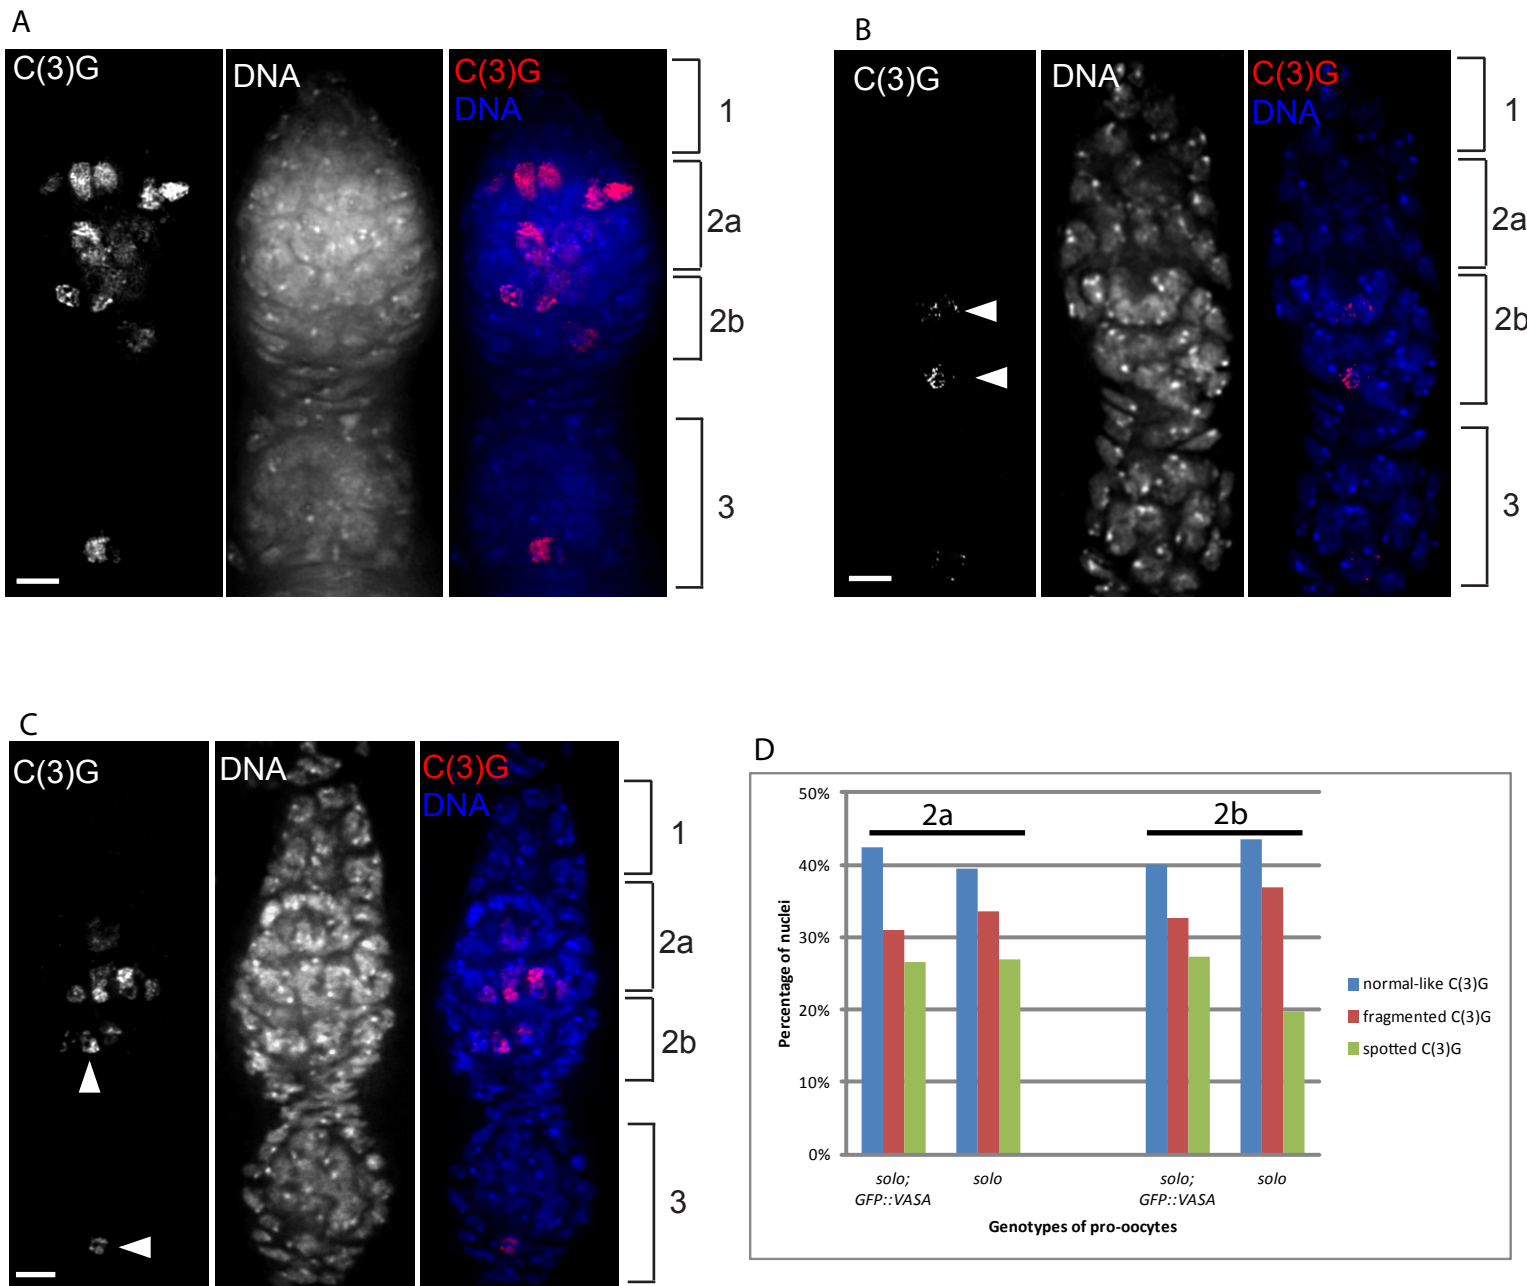

Figure S6
