# Supplementary material for: The Cohesion Protein SOLO Associates with SMC1 and Is Required for Synapsis, Recombination, Homolog Bias and Cohesion and Pairing of Centromeres in Drosophila Meiosis
Source: PubMed Central journal article supplement (PMC3715423; doi:10.1371/journal.pgen.1003637), 2013-07-18
Supplement: pgen.1003637.s010.pdf [file pgen.1003637.s010.pdf]

Table S1. Results of SOLO transgene NDJ rescue experiments.

| Genotypes <sup>a</sup>                                                  | %NDJ <sup>b</sup> | N <sup>c</sup> |
|-------------------------------------------------------------------------|-------------------|----------------|
| <i>w/+; solo<sup>Z2-0198</sup>/Df; UASp-Venus::SOLO/nos-GAL4</i>        | 0%                | 713            |
| <i>w/+; solo<sup>Z2-0198</sup>/Df; UASp-Venus::SOLO or nos-GAL4/TM2</i> | 57.10%            | 180            |
| <i>w/+; solo<sup>Z2-0198</sup>/Df; UASp-SOLO::Venus/nos-GAL4</i>        | 0%                | 212            |
| <i>w/+; solo<sup>Z2-0198</sup>/Df; UASp-FH::SOLO/nos-GAL4</i>           | 0%                | 1468           |
| <i>w/+; solo<sup>Z2-0198</sup>/Df; UASp-FH::SOLO or nos-GAL4/TM2</i>    | 51.70%            | 155            |
| <i>UPS-SOLO; solo<sup>Z2-0198</sup>/Df; UPS-SOLO (4)</i>                | 7.03%             | 302            |
| <i>UPS-SOLO/w; solo<sup>Z2-0198</sup>/Df; UPS-SOLO (3)</i>              | 8.06%             | 119            |
| <i>w/w; solo<sup>Z2-0198</sup>/Df; UPS-SOLO (2)</i>                     | 10.97%            | 655            |
