# Supplementary material for: The Cohesion Protein SOLO Associates with SMC1 and Is Required for Synapsis, Recombination, Homolog Bias and Cohesion and Pairing of Centromeres in Drosophila Meiosis
Source: PubMed Central journal article supplement (PMC3715423; doi:10.1371/journal.pgen.1003637), 2013-07-18
Supplement: pgen.1003637.s011.pdf [file pgen.1003637.s011.pdf]

Table S2. Rescue of *solo* female fertility by GFP::*VAS*.

| Genotypes                                                            | progeny/female | NDJ    | N   |
|----------------------------------------------------------------------|----------------|--------|-----|
| <i>w; solo<sup>Z2-0198</sup>/Df; GFP::<i>VAS</i>/MKRS</i>            | 8.8            | 45.45% | 203 |
| <i>w; solo<sup>Z2-0198</sup>/Df; GFP::<i>VAS</i>/GFP::<i>VAS</i></i> | 8.4            | 47.69% | 167 |
| <i>w; solo<sup>Z2-0198</sup>/Df; TM6/MKRS</i>                        | 4.5            | 48.57% | 89  |
| WT                                                                   | 79.1           | 0%     | 633 |
